# Supplementary material for: Aspirin exerts high anti-cancer activity in PIK3CA-mutant colon cancer cells
Source: PubMed Central journal article supplement (PMC5675640; doi:10.18632/oncotarget.20972), 2017-09-18
Supplement: oncotarget-08-87379-s001.pdf [file oncotarget-08-87379-s001.pdf]

## Aspirin exerts high anti-cancer activity in *PIK3CA*-mutant colon cancer cells

### SUPPLEMENTARY MATERIALS

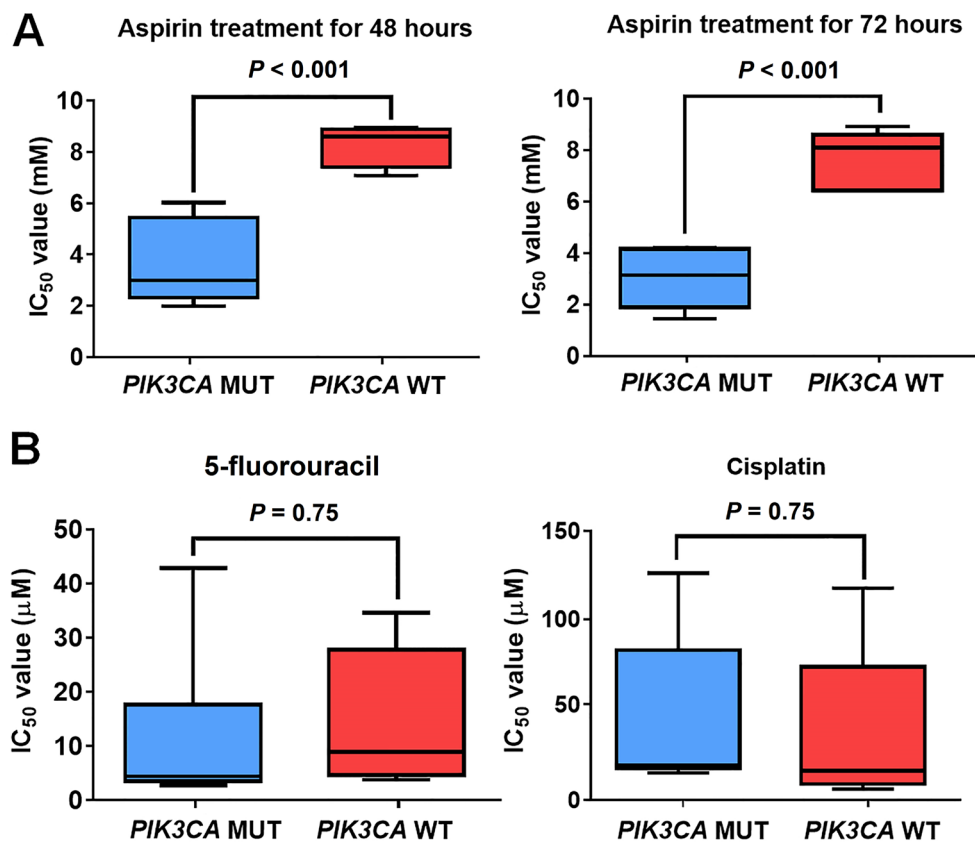

**Supplementary Figure 1:  $IC_{50}$  values of aspirin and chemotherapeutic agents in colon cancer cell lines.**  $IC_{50}$  values following treatment with aspirin for 48 hours (A, left) or 72 hours (A, right) in the human colon cancer cell panel were calculated using sigmoidal curve fitting.  $IC_{50}$  values of 5-fluorouracil (B, left) or cisplatin (B, right) in human colon cancer cell panel were quoted from the compound sensitivity database of cancer cell line encyclopedia (CCLE). Student's *t*-test was performed to determine significance between *PIK3CA*-mutant and *PIK3CA*-wild-type groups. Data represent mean  $\pm$  standard deviation of three replicates.  $IC_{50}$ : half maximal inhibitory concentration; MUT, mutation; WT, wild-type.
